# Supplementary material
Source: Springer Nature journal article supplement (https://www.springermedizin.de/resource/supplementary/12885_2010_3072_MOESM4_ESM.pdf/9462130)

**Rag 2<sup>-/-</sup>****Rag 2<sup>-/-</sup> + GFP<sup>+</sup> CD19<sup>+</sup> UVBL-1****Lymph Node**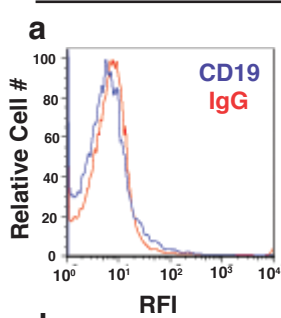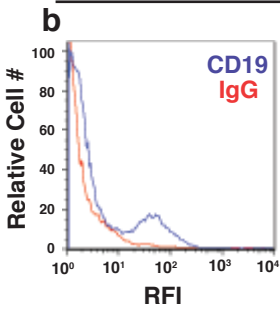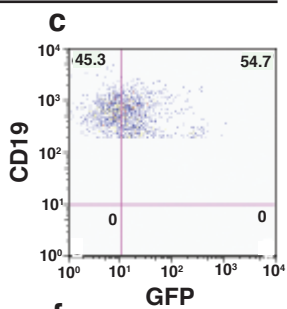**Spleen**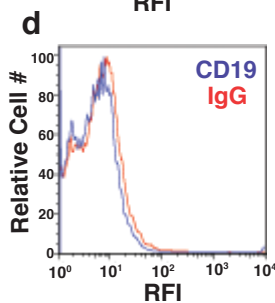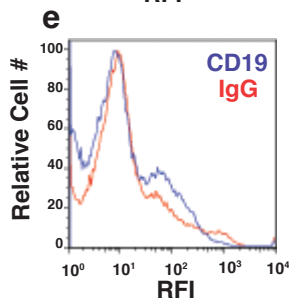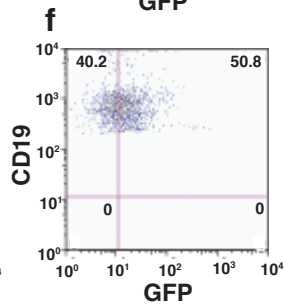**Bone Marrow**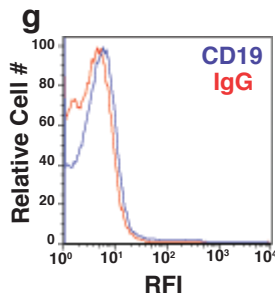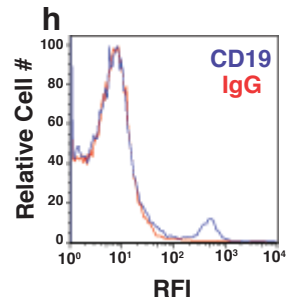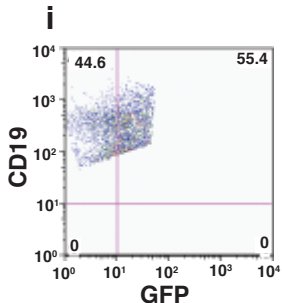

Supplement: MOESM4 [file 9462130]
